# Supplementary material for: A highly selective and sensitive fluorescent probe for thiols based on a benzothiazole derivative
Source: Royal Society of Chemistry journal article supplement (doi:10.1039/c6ay02140a), 2016-01-01
Supplement: c6ay02140a1.pdf [file c6ay02140a1.pdf]

## Supporting Information

### **A highly selective and sensitive fluorescent probe for thiols based on a benzothiazole derivative**

Suxiang Feng<sup>1,2</sup>, Xian li<sup>1</sup>, Qiujuan Ma<sup>1,\*</sup>, Beibei Liang<sup>1</sup> and Zhuoyi Ma<sup>1</sup>

*<sup>1</sup>School of Pharmacology, Henan University of Traditional Chinese Medicine, Zhengzhou 450046, PR China*

*<sup>2</sup>Collaborative Innovation Center for Respiratory Disease Diagnosis and Treatment & Chinese Medicine Development of Henan Province, Zhengzhou 450046, PR China*

\*Corresponding author, E-mail: maqiujuan104@126.com; Tel: +86-371-65676656; Fax: +86-371-65680028.

## Table of contents

|                                            |    |
|--------------------------------------------|----|
| <b>Figure S1</b> .....                     | S3 |
| <b>Figure S2</b> .....                     | S4 |
| <b>Figure S3</b> .....                     | S5 |
| <b>Figure S4</b> .....                     | S6 |
| <b>NMR and MS data for compounds</b> ..... | S8 |

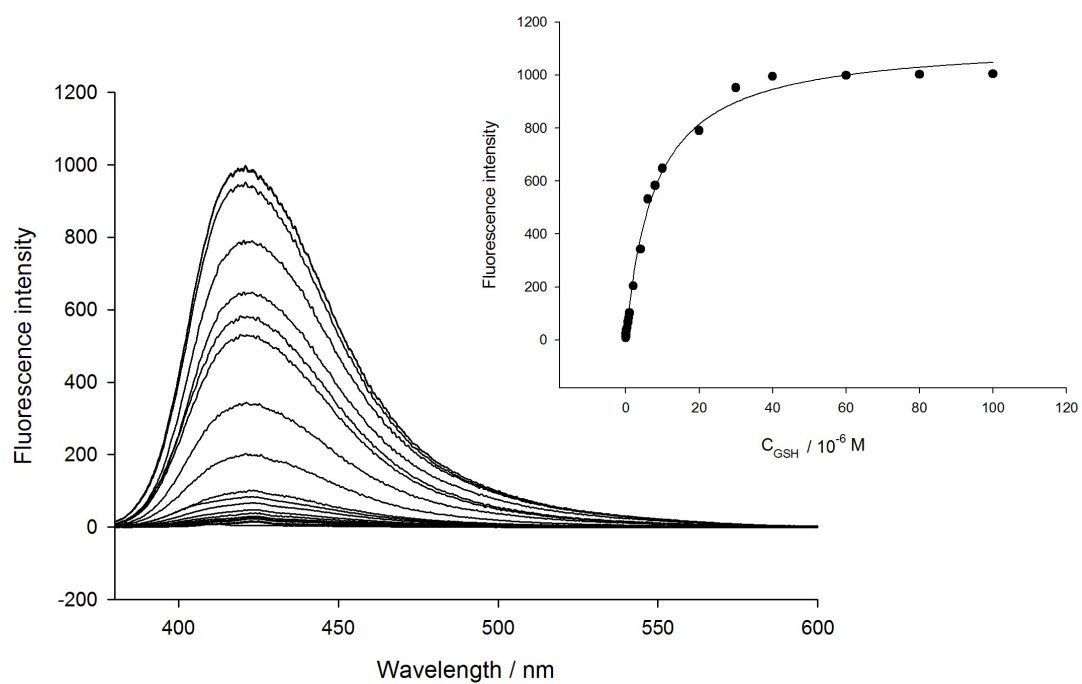

**Figure S1** One-photon fluorescence spectra of probe **1** (5.0  $\mu$ M) in the presence of various concentrations of glutathione: 0, 0.02, 0.04, 0.06, 0.08, 0.1, 0.2, 0.4, 0.6, 0.8, 1, 2, 4, 6, 8, 10, 20, 30, 40, 60, 80, 100  $\mu$ M from 1 to 22 ( $\lambda_{\text{ex}} = 360$  nm). Inset: fluorescence intensity at 423 nm as a function of the concentration of glutathione.

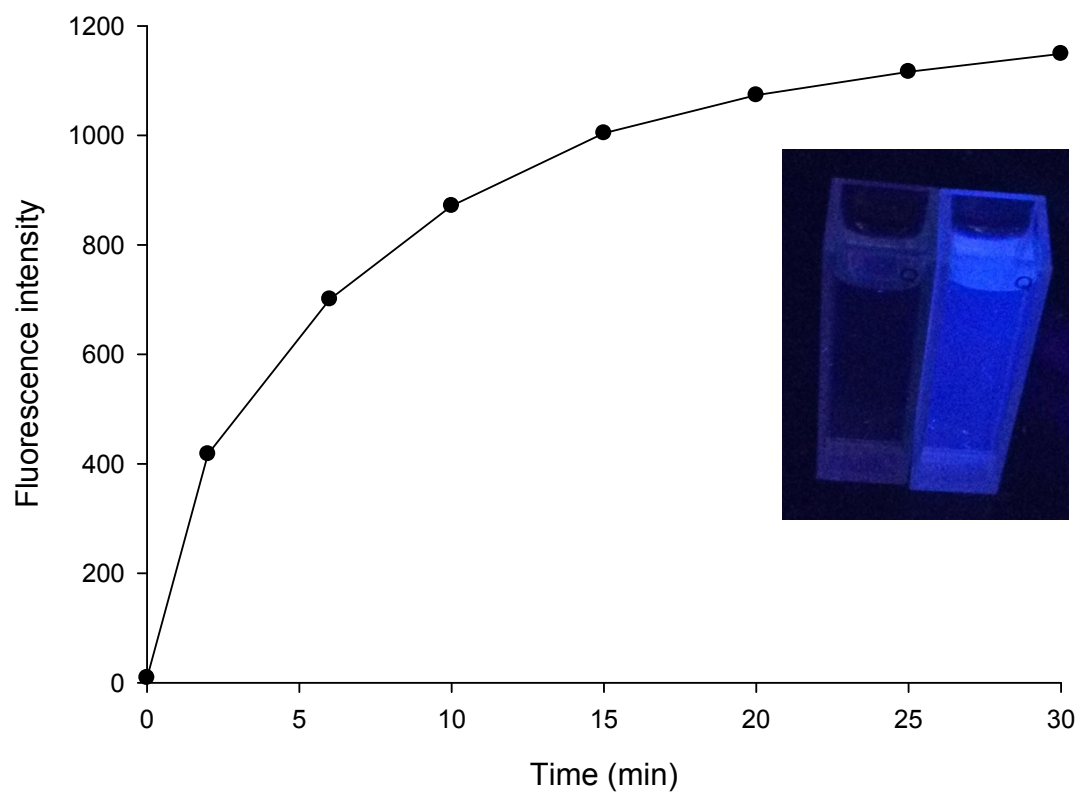

**Figure S2** Time-dependent fluorescence intensity changes of probe **1** ( $5.0 \mu\text{M}$ ) for  $100 \mu\text{M}$  glutathione. Time points represent 0, 2, 6, 10, 15, 20, 25 and 30 min. The inset show the visual fluorescence color of probe **1** ( $5.0 \mu\text{M}$ ) before (left) and after (right) incubation with with glutathione for 15 min (UV lamp, 365 nm). The fluorescence intensity is recorded at 423 nm.

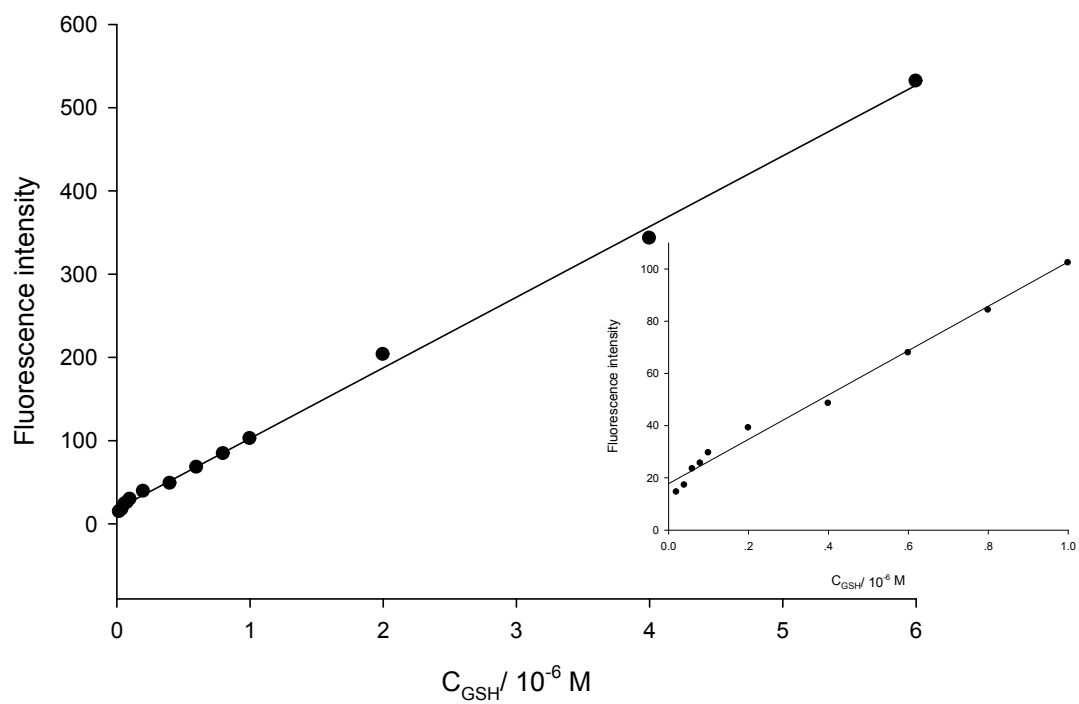

**Figure S3** One-photon fluorescence titration curve of probe **1** (5.0  $\mu\text{M}$ ) for glutathione. Insert: the plot of fluorescence intensity of probe **1** (5.0  $\mu\text{M}$ ) as a function of the concentration of glutathione from 0.02  $\mu\text{M}$  to 6.0  $\mu\text{M}$ . The fluorescence intensity is recorded at 423 nm.

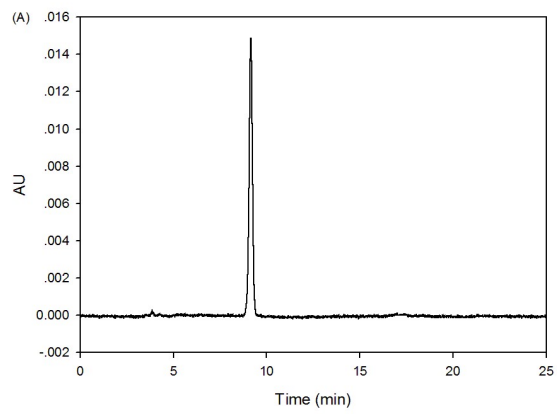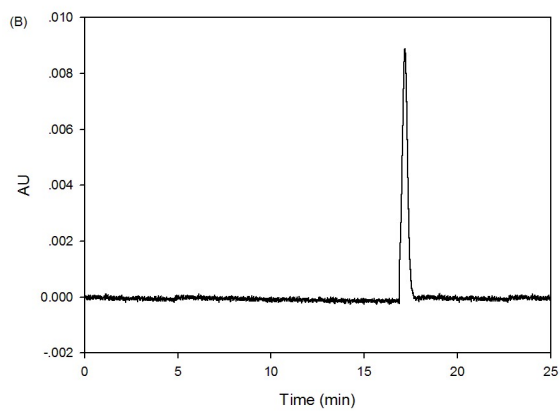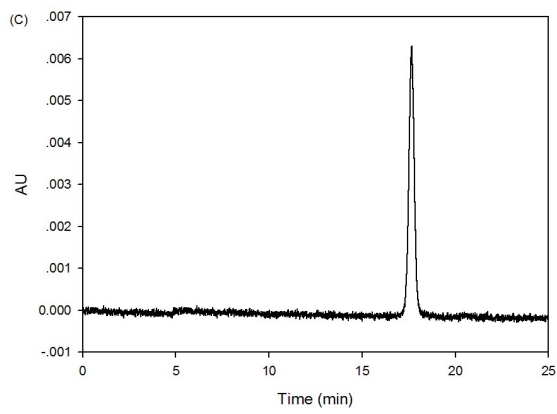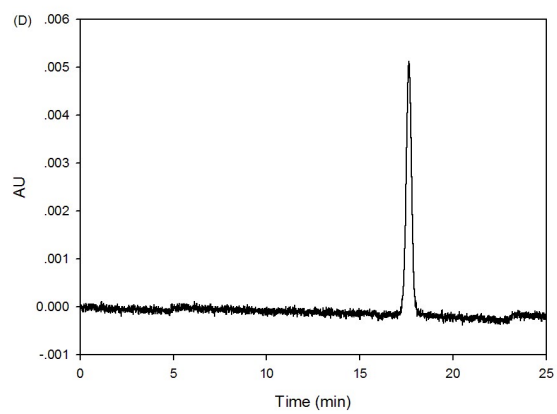

**Figure S4** HPLC profiles of (A) compound **1** (5  $\mu\text{M}$ ), (B) compound **2** (5  $\mu\text{M}$ ), (C) the reaction product of compound **1** (5  $\mu\text{M}$ ) with cysteine (200  $\mu\text{M}$ ) and (D) the reaction product of compound **1** (5  $\mu\text{M}$ ) with glutathione (100  $\mu\text{M}$ ). HPLC conditions: 1.0 mL/min flow rate, Agela Technologies Venusil XBP -C18: 5  $\mu\text{m}$ , 4.6  $\times$  250 mm column, methanol/water = 90:10 (v/v), detected at 360 nm.

## NMR and MS data for compounds

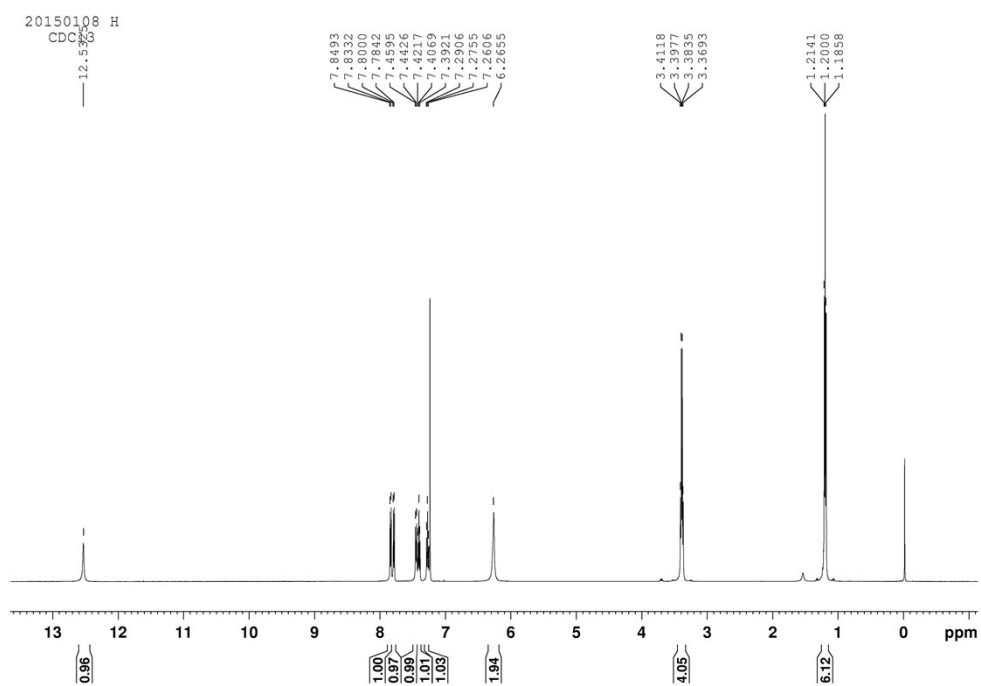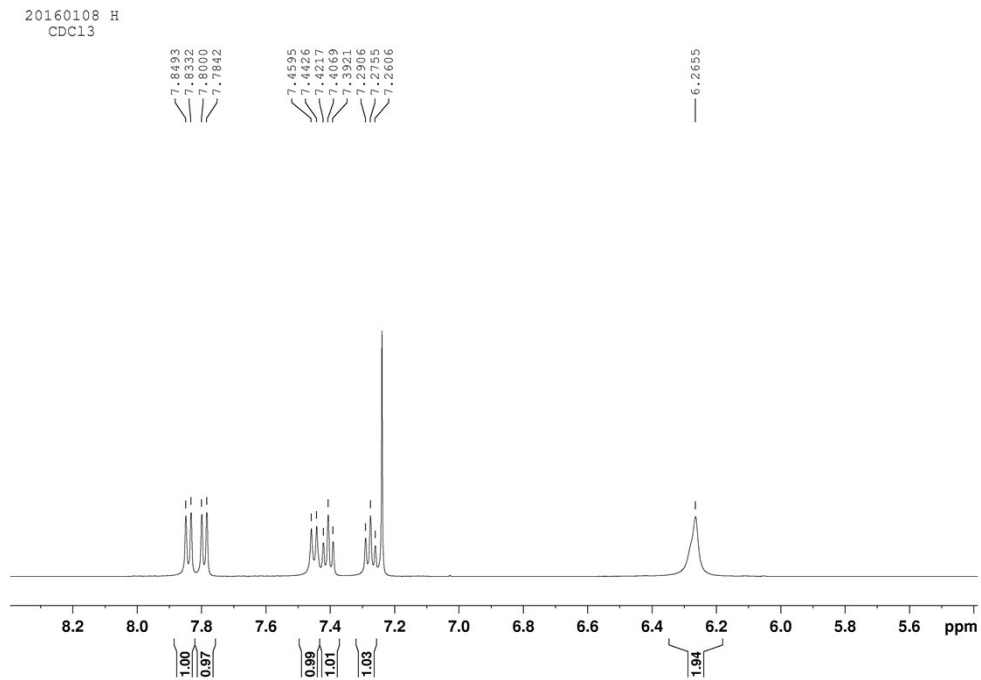

Figure S5. <sup>1</sup>H NMR spectrum of compound **2** in CDCl<sub>3</sub>.



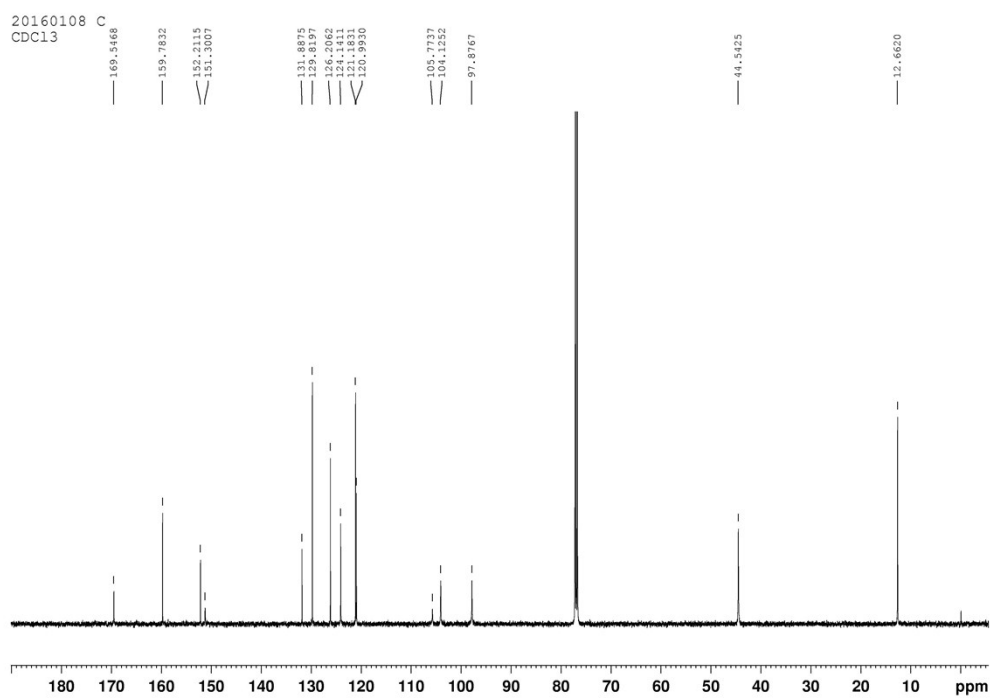

**Figure S6.** <sup>13</sup>C NMR spectrum of compound **2** in CDCl<sub>3</sub>.

# Display Report

Analysis Info  
Analysis Name: \\MQHD21303\Data\GJHM\QJ298.d  
Method: tune\_pos\_standard\_20141031.m  
Sample Name: 298  
Comment:

Acquisition Date: 2016/1/14 9:52:57  
Operator: BDAL@DE  
Instrument: maxis HD  
1820881.21303

| Acquisition Parameter | ESI      | Ion Polarity         | Potential | Set Nebulizer    | 0.3 Bar    |
|-----------------------|----------|----------------------|-----------|------------------|------------|
| Source Type           | Active   | SetCapillary         | 3600 V    | Set Dry Heater   | 200 jC     |
| Focus                 | 50 m/z   | Set End Plate Offset | -500 V    | Set Dry Gas      | 4.0 mL/min |
| Scan Range            | 3000 m/z | Set Charging Voltage | 2000 V    | Set Outlet Valve | 0.5 jC     |
| Scan End              |          | Set Corona           | 0.1 A     | Set APC Heater   | 0.5 jC     |

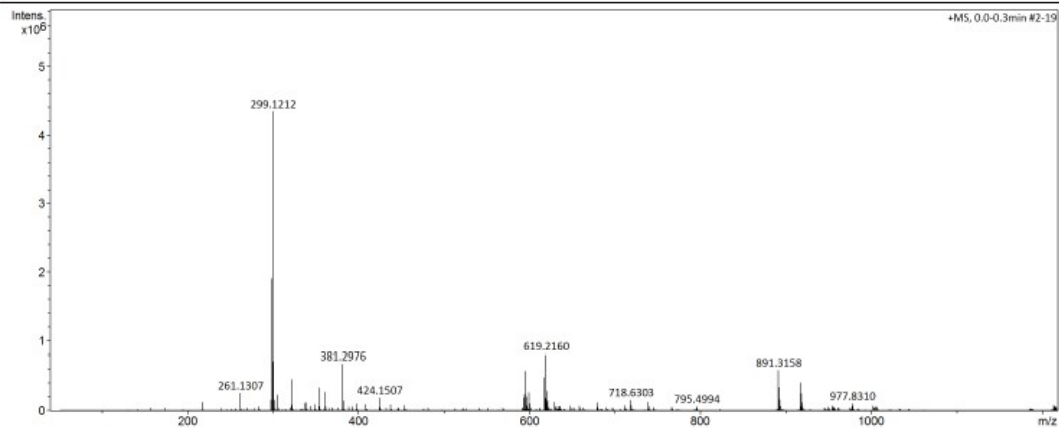

298.d  
Breker Compass DataAnalysis 4.2  
printed: 2016/1/18 9:51:16  
by: ZMH  
Page 1 of 1

Figure S7. MS spectrum of compound 2.

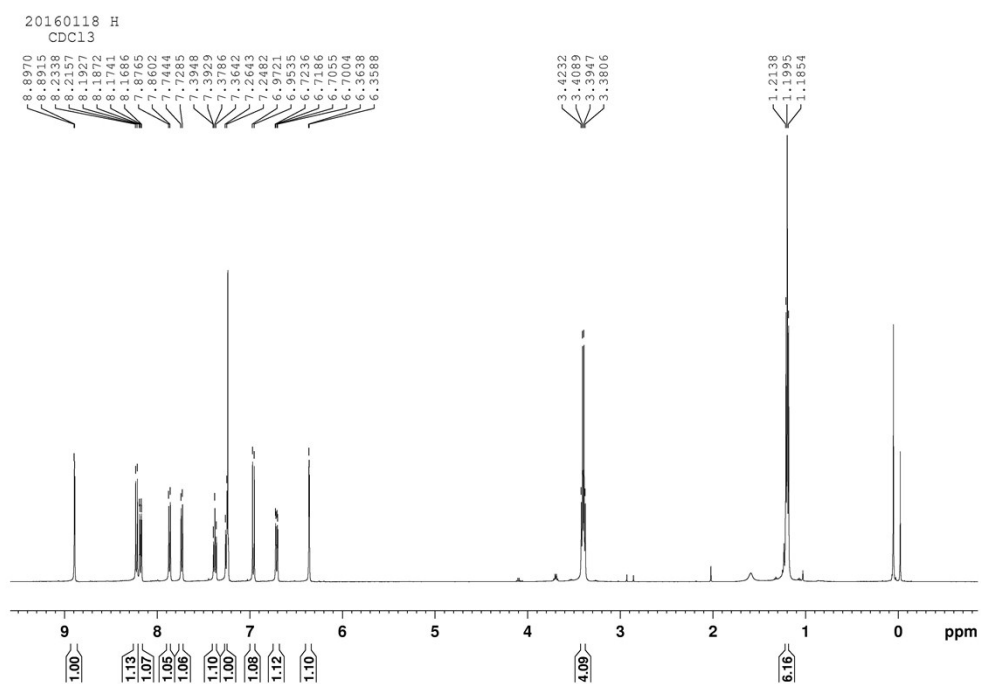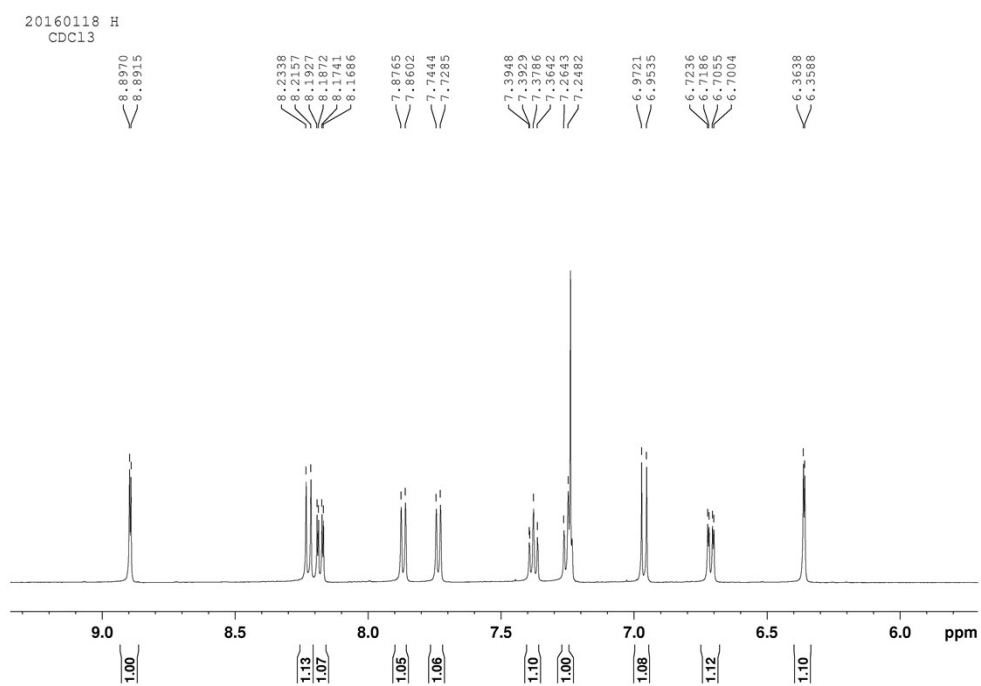

**Figure S8.** <sup>1</sup>H NMR spectrum of compound **1** in CDCl<sub>3</sub>.

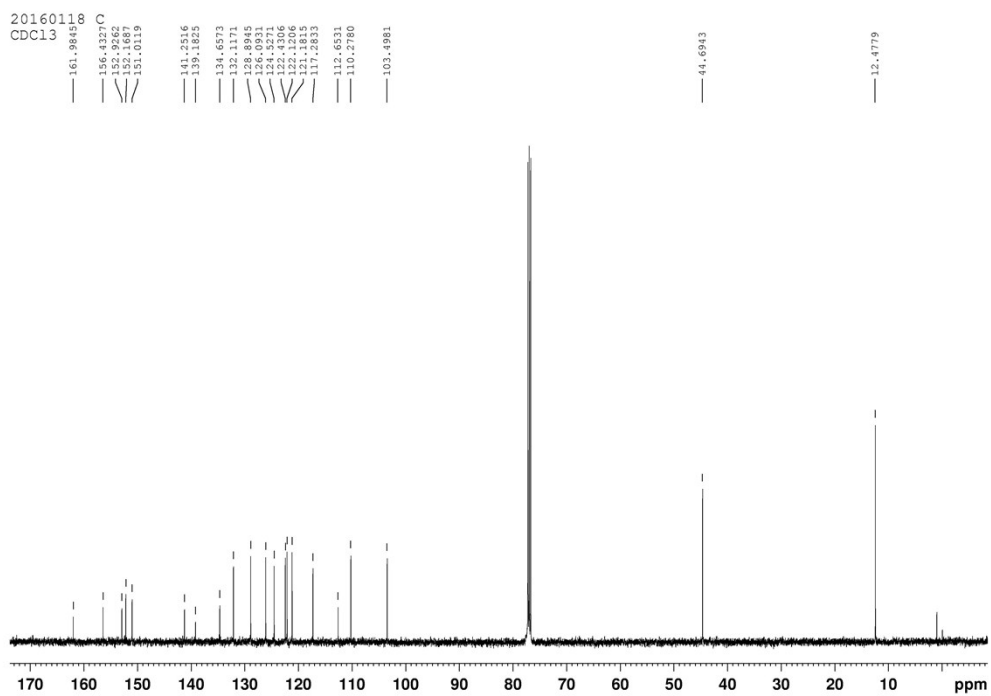

**Figure S9.**  $^{13}\text{C}$  NMR spectrum of compound **1** in  $\text{CDCl}_3$ .

# Display Report

|               |                              |                  |                    |
|---------------|------------------------------|------------------|--------------------|
| Analysis Info |                              | Acquisition Date | 2016/12/8 16:04:27 |
| Analysis Name | W:\QHD21303\Data\GJHW\YMQJ.d | Operator         | BDAL@DE            |
| Method        | tune_pos_standard_20141031.m | Instrument       | maxis HD           |
| Sample Name   | MQJ                          |                  | 1820881.21303      |
| Comment       |                              |                  |                    |

|                       |          |                      |          |                 |            |
|-----------------------|----------|----------------------|----------|-----------------|------------|
| Acquisition Parameter |          |                      |          |                 |            |
| Source Type           | ESI      | Ion Polarity         | Positive | Set Nebulizer   | 0.3 Bar    |
| Focus                 | Active   | Set Capillary        | 3600 V   | Set Dry Heater  | 200 °C     |
| Scan Begin            | 50 m/z   | Set End Plate Offset | -500 V   | Set Dry Gas     | 4.0 mL/min |
| Scan End              | 3000 m/z | Set Charging Voltage | 2000 V   | Set Dwell Time  | Waste      |
|                       |          | Set Corona           | 0.1 A    | Set APCI Heater | 0 °C       |

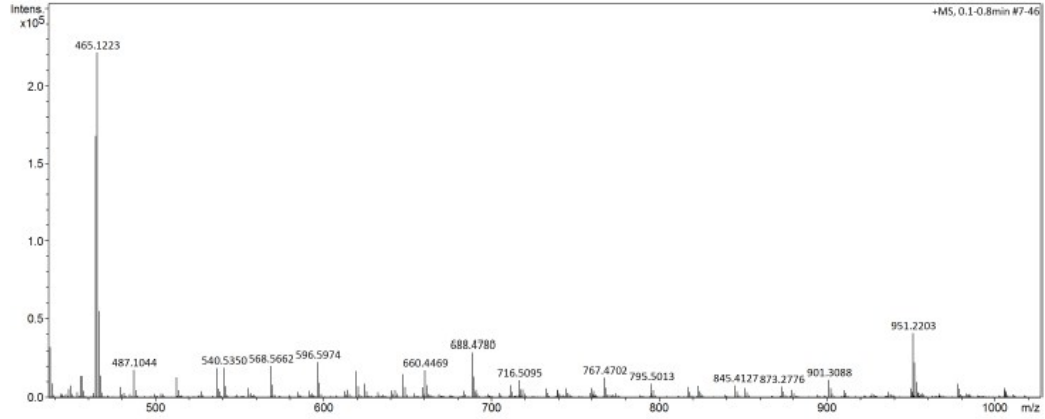

MQJ.d  
Bruker Compass DataAnalysis 4.2 printed: 2016/12/7 8:31:22 by: ZMH Page 1 of 1

Figure S10. MS spectrum of compound 1.
